# Supplementary material
Source: PubMed Central journal article supplement (PMC5002357)
Supplement: NIHMS810602-supplement-Supplementary_Tables.pdf [file NIHMS810602-supplement-Supplementary_Tables.pdf]

## SUPPLEMENTARY TABLES

Supplementary Table I. Summary of phenotyping result of canine lymphoma samples.

| Sample ID | Histological Classification <sup>a</sup> | CD20 (6C8) | CD21             | CD22 | CD3 | CD5 | CD4 | CD8 | CD45 |
|-----------|------------------------------------------|------------|------------------|------|-----|-----|-----|-----|------|
| DLYM-0902 | DLBCL                                    | ++         | ++               | ++   | -   | -   | -   | -   | +++  |
| DLYM-1001 | DLBCL                                    | ++         | ++               | ++   | -   | -   | -   | -   | +++  |
| DLYM-1002 | DLBCL                                    | +++        | +++              | +++  | -   | -   | -   | -   | +++  |
| DLYM-1003 | DLBCL                                    | +++        | +++              | +++  | -   | -   | -   | -   | +++  |
| DLYM-1004 | DLBCL                                    | +++        | +++              | +++  | -   | -   | -   | -   | +++  |
| DLYM-1005 | DLBCL                                    | +++        | +++              | +++  | -   | -   | -   | -   | +++  |
| DLYM-1007 | MZL                                      | +++        | +++              | +++  | -   | -   | -   | -   | +++  |
| DLYM-1009 | DLBCL                                    | +++        | +++              | +++  | -   | -   | -   | -   | +++  |
| DLYM-1012 | DLBCL                                    | +++        | +++              | +++  | -   | -   | -   | -   | +++  |
| DLYM-1013 | DLBCL <sup>b</sup>                       | +++        | +++              | +++  | -   | -   | -   | -   | +++  |
| DLYM-1014 | DLBCL                                    | +          | +                | ++   | -   | -   | -   | -   | +++  |
| DLYM-1015 | BL                                       | +++        | ++               | ++   | -   | -   | -   | -   | +++  |
| DLYM-1016 | DLBCL                                    | ++         | +                | ++   | -   | -   | -   | -   | +++  |
| DLYM-1017 | DLBCL                                    | +++        | +++              | +++  | -   | -   | -   | -   | +++  |
| DLYM-1018 | DLBCL <sup>b</sup>                       | +++        | +++              | +    | -   | -   | -   | -   | +++  |
| DLYM-1101 | BL                                       | +++        | +++              | +++  | -   | -   | -   | -   | +++  |
| DLYM-1102 | DLBCL                                    | +++        | +++              | +++  | -   | -   | -   | -   | +++  |
| DLYM-1103 | DLBCL                                    | ++         | ++               | ++   | -   | -   | -   | -   | +++  |
| DLYM-1104 | MZL                                      | ++         | ++               | ++   | -   | -   | -   | -   | +++  |
| DLYM-1106 | MZL                                      | +          | +                | +    | -   | -   | -   | -   | +++  |
| DLYM-1107 | DLBCL                                    | +++        | +++              | +++  | -   | -   | -   | -   | +++  |
| DLYM-1108 | DLBCL                                    | +          | +                | +    | -   | -   | -   | -   | +++  |
| DLYM-0901 | TZL                                      | -          | -                | -    | +   | +   | +   | -   | +++  |
| DLYM-1006 | PTCL                                     | -          | -                | -    | +   | ±   | +   | -   | +++  |
| DLYM-1008 | TZL                                      | -          | +++ <sup>c</sup> | -    | +   | +   | -   | ±   | -    |
| DLYM-1010 | PTCL                                     | -          | -                | -    | +++ | -   | ±   | -   | +++  |
| DLYM-1011 | TZL                                      | -          | +++ <sup>c</sup> | -    | +++ | ++  | -   | -   | -    |
| DLYM-1019 | TZL                                      | -          | +++ <sup>c</sup> | -    | ++  | ++  | -   | ±   | +++  |
| DLYM-1105 | PTCL                                     | -          | -                | -    | +   | ±   | -   | ±   | +++  |

The percentage of cells that express indicated CD molecule in total cells was determined using flow cytometry. -: <30%, ±; 30-70%, +; >70%, ++; >80%, +++; >90%.

<sup>a</sup> DLBCL; diffuse large B-cell lymphoma, MZL; marginal-zone lymphoma, BL; Burkitt lymphoma, TZL; T-zone lymphoma, PTCL; peripheral T-cell lymphoma not otherwise specified.

<sup>b</sup> These samples were not clearly distinguishable from late-stage MZL.

<sup>c</sup> The expression of CD21 (complement receptor 2 or CR2) was previously reported in canine TZL. [Frantz AM, Sarver AL, Ito D, et al. Molecular profiling reveals prognostically significant subtypes of canine lymphoma. Vet Pathol 2013;50:693-703.]

Supplementary Table II. Summary of direct cytotoxicity assay using primary canine B-cell lymphoma cells.

| Sample ID         | IgG1/No Ab      | 6C8/No Ab                    |
|-------------------|-----------------|------------------------------|
| DLYM-1004         | 102.2           | 112.4                        |
| DLYM-1005         | 99.1            | 101.8                        |
| DLYM-1016         | 99.3            | 102.6                        |
| DLYM-1103         | 99.6            | 117.4                        |
| Mean $\pm$ S.E.M. | 100.1 $\pm$ 0.7 | 108.5 $\pm$ 3.8 <sup>d</sup> |

The percent of live cells normalized to the number of cells present at the end of the culture period in the conditions with no antibody treatment is shown.

<sup>d</sup>There were no statistically significant differences in cell viability in cells treated with IgG1 and 6C8 (two-tailed t test for paired samples).

Supplementary Table III. Summary of complement-dependent cytotoxicity using primary canine B-cell lymphoma cells.

| Sample ID         | IgG1+RC/RC     | 6C8+RC/RC                   |
|-------------------|----------------|-----------------------------|
| DLYM-1004         | 87.3           | 78.1                        |
| DLYM-1005         | 101.6          | 100.7                       |
| DLYM-1016         | 84.6           | 90.9                        |
| Mean $\pm$ S.E.M. | 91.1 $\pm$ 5.3 | 89.9 $\pm$ 6.5 <sup>e</sup> |

The percent of live cells normalized to the number of cells present at the end of the culture period in the conditions with RC only treatment sample is shown.

<sup>e</sup>There were no statistically significant differences in cell viability in cells treated with IgG1 and 6C8 (two-tailed t test for paired samples).
